# Supplementary material
Source: PubMed Central journal article supplement (PMC10183366)
Supplement: mmc1.pdf [file mmc1.pdf]

**The American Journal of Human Genetics, Volume 110**

**Supplemental information**

**Scalable mixed model methods for set-based association  
studies on large-scale categorical data analysis and  
its application to exome-sequencing data in UK Biobank**

**Wenjian Bi, Wei Zhou, Peipei Zhang, Yaoyao Sun, Weihua Yue, and Seunggeun Lee**

Figure S1. Minor allele counts distribution of the randomly selected 1,000 genes.

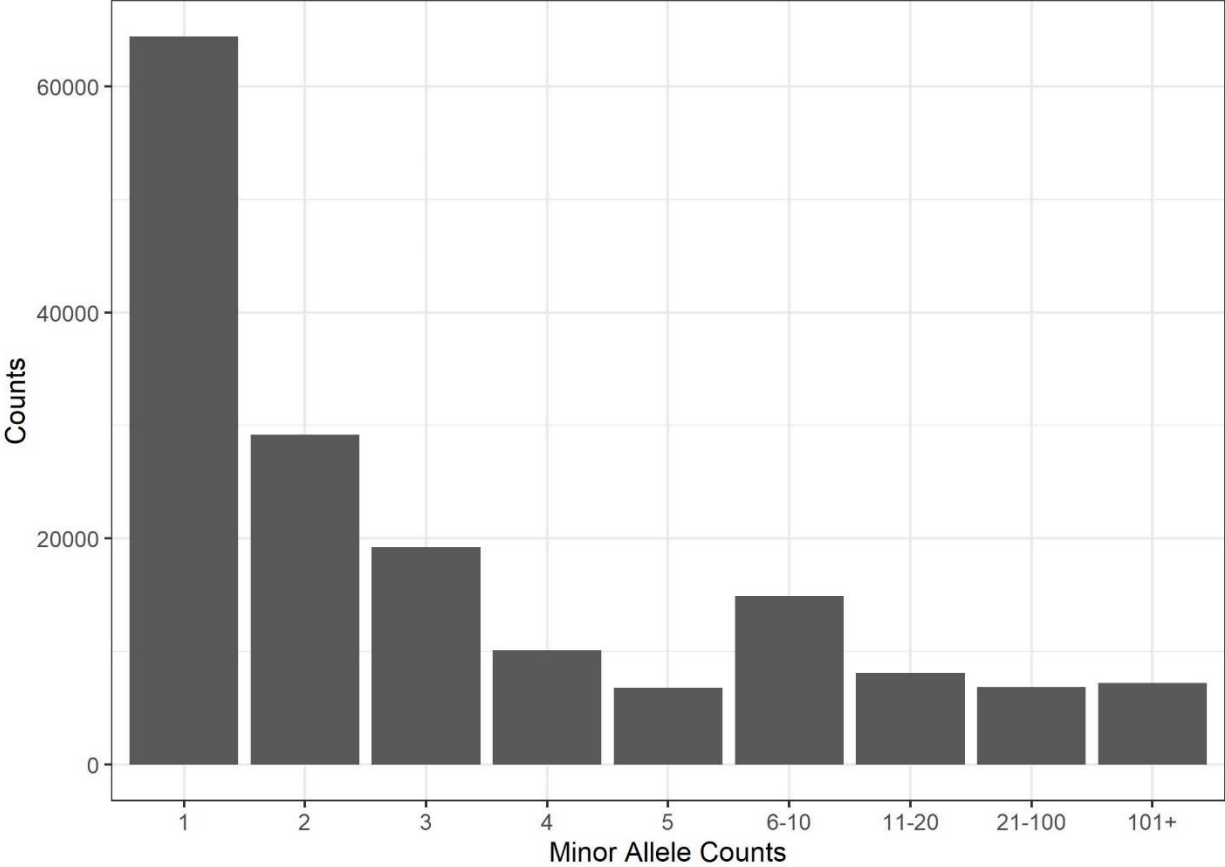

Figure S2. Sample size distribution for the four phenotypes in UK Biobank data analysis

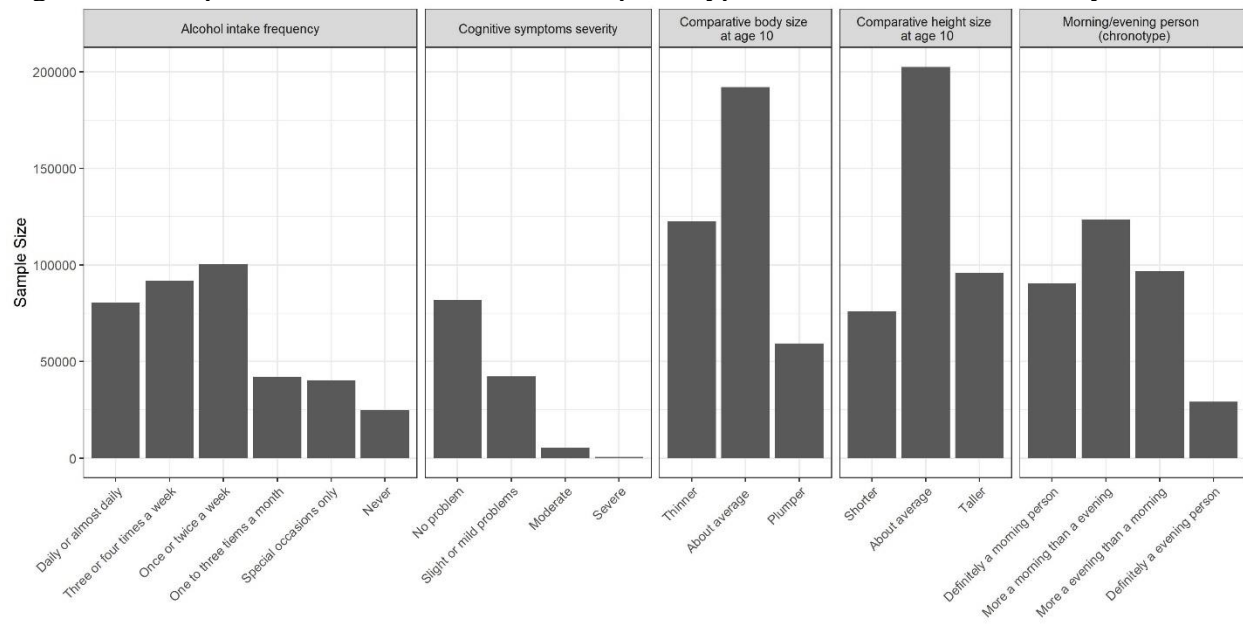

Figure S3. Distribution of chi-square statistics of POLMM-GENE and SAIGE-GENE+ (BINA). The sample size distribution of the three categorical levels is  $n_1:n_2:n_3=10:1:1$ . SAIGE-GENE+ considered the categorical data as a binary phenotype ( $n_1:n_2+n_3=10:2=5:1$ ). A total of 9 scenarios include 3 settings of causal variants proportional and three settings of the effect directions. For high proportion of causal variants, we simulated 80% of LoF and 50% of missense variants as causal variants; for moderate proportion of causal variants, we simulated 50% of LoF and 20% of missense variants as causal variants; for low proportion of causal variants, we simulated 20% of LoF and 10% of missense variants as causal variants.

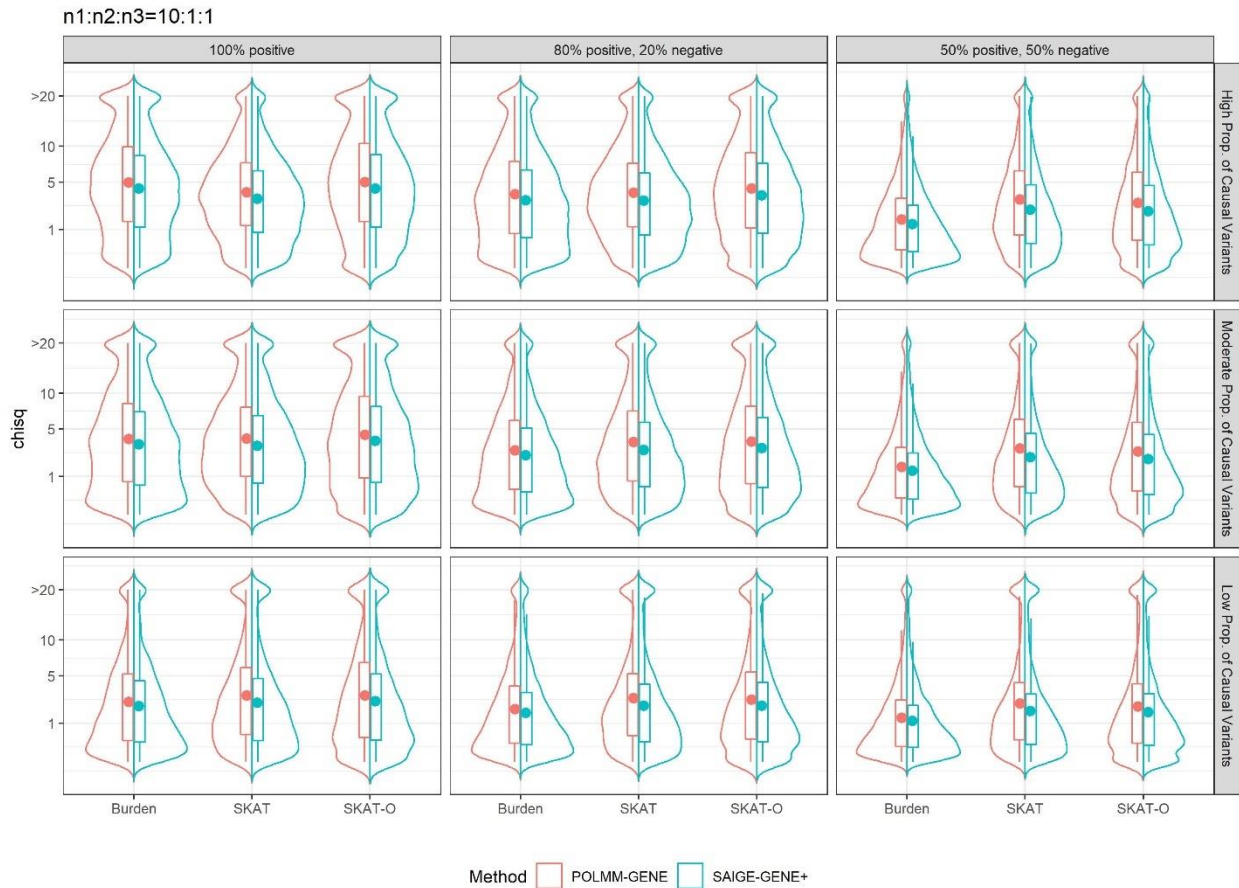

Figure S4. Distribution of chi-square statistics of POLMM-GENE and SAIGE-GENE+ (BINA). The sample size distribution of the three categorical levels is  $n_1:n_2:n_3=30:1:1$ . SAIGE-GENE+ considered the categorical data as a binary phenotype ( $n_1:n_2+n_3=30:2=15:1$ ). A total of 9 scenarios include 3 settings of causal variants proportional and three settings of the effect directions. For high proportion of causal variants, we simulated 80% of LoF and 50% of missense variants as causal variants; for moderate proportion of causal variants, we simulated 50% of LoF and 20% of missense variants as causal variants; for low proportion of causal variants, we simulated 20% of LoF and 10% of missense variants as causal variants.

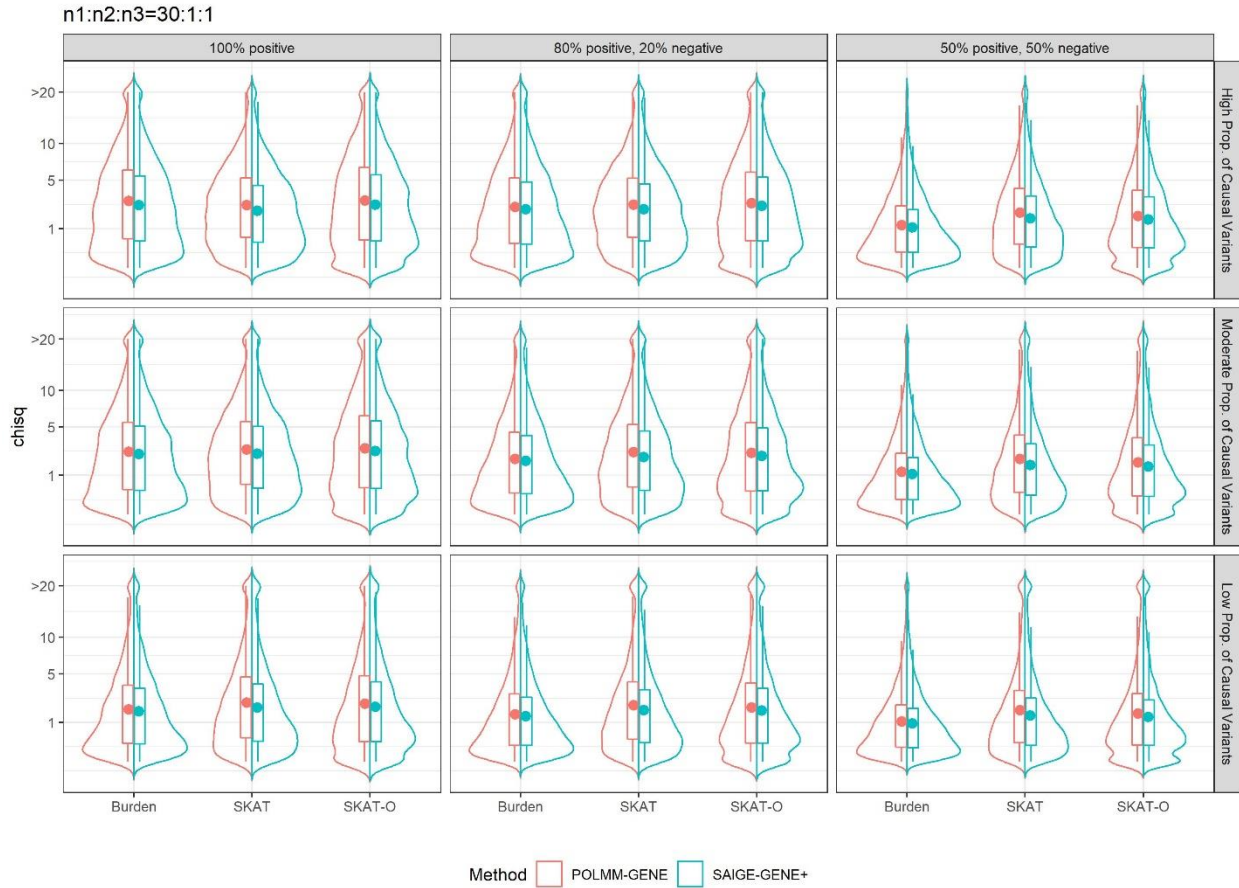

Figure S5. Distribution of chi-square statistics of POLMM-GENE and SAIGE-GENE+ (RAW). SAIGE-GENE+ (RAW) considered the categorical data as a raw quantitative phenotype of 1, 2, and 3. A total of 9 scenarios include 3 settings of causal variants proportional and three settings of the effect directions. For high proportion of causal variants, we simulated 80% of LoF and 50% of missense variants as causal variants; for moderate proportion of causal variants, we simulated 50% of LoF and 20% of missense variants as causal variants; for low proportion of causal variants, we simulated 20% of LoF and 10% of missense variants as causal variants.

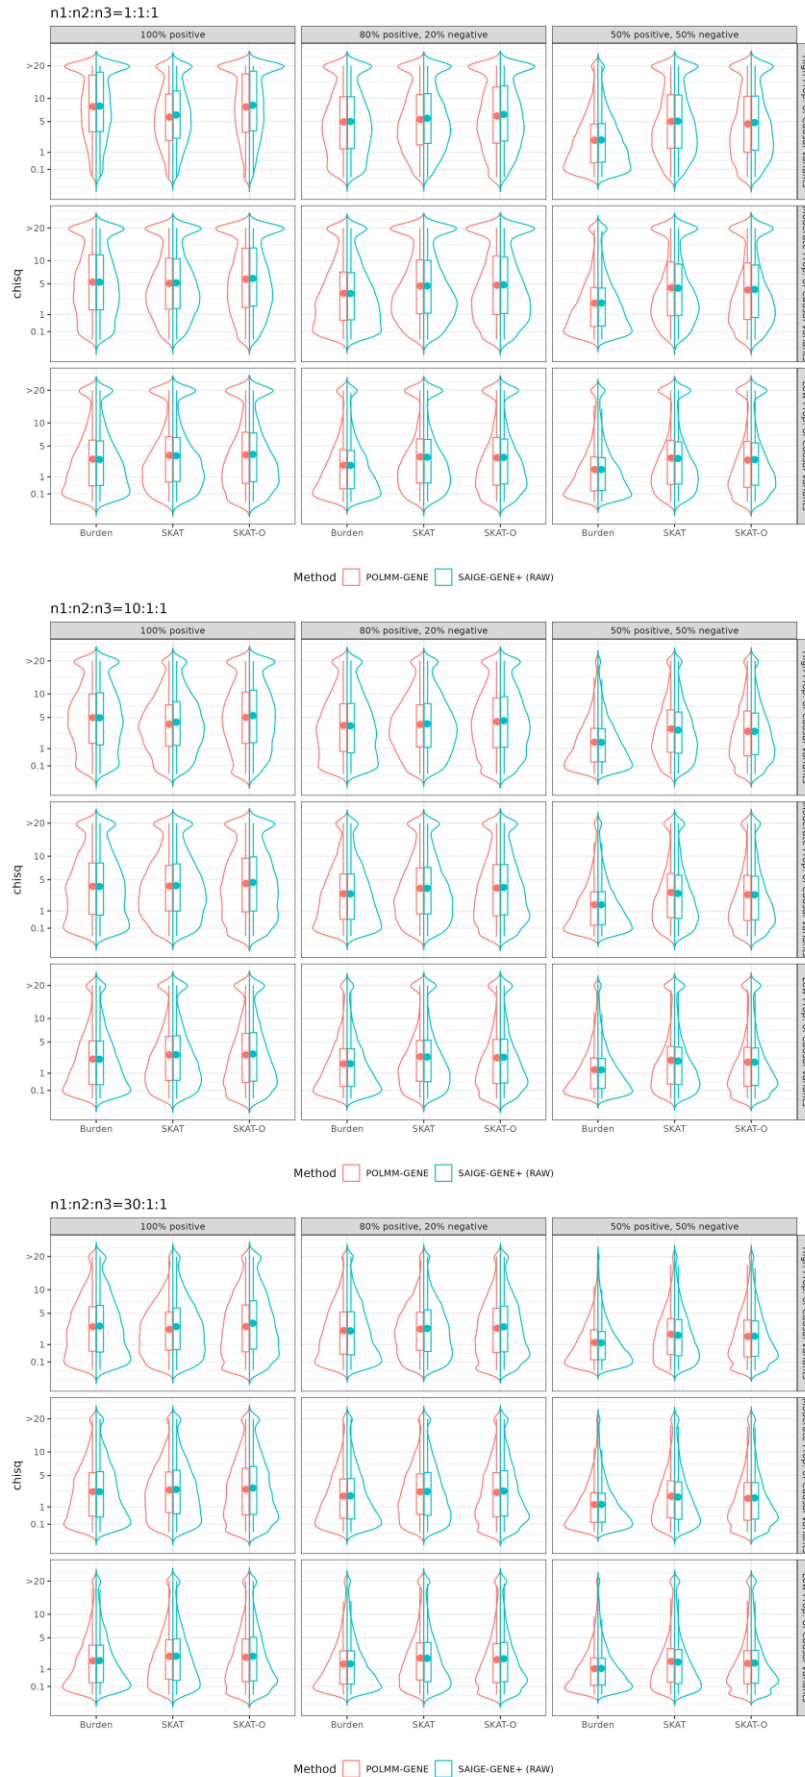

Figure S6. Distribution of chi-square statistics of POLMM-GENE and SAIGE-GENE+ (INT). SAIGE-GENE+ (INT) considered the categorical data as a quantitative phenotype of 1, 2, and 3. Inverse normalization transformation is conducted for phenotype prior to analysis. A total of 9 scenarios include 3 settings of causal variants proportional and three settings of the effect directions. For high proportion of causal variants, we simulated 80% of LoF and 50% of missense variants as causal variants; for moderate proportion of causal variants, we simulated 50% of LoF and 20% of missense variants as causal variants; for low proportion of causal variants, we simulated 20% of LoF and 10% of missense variants as causal variants.

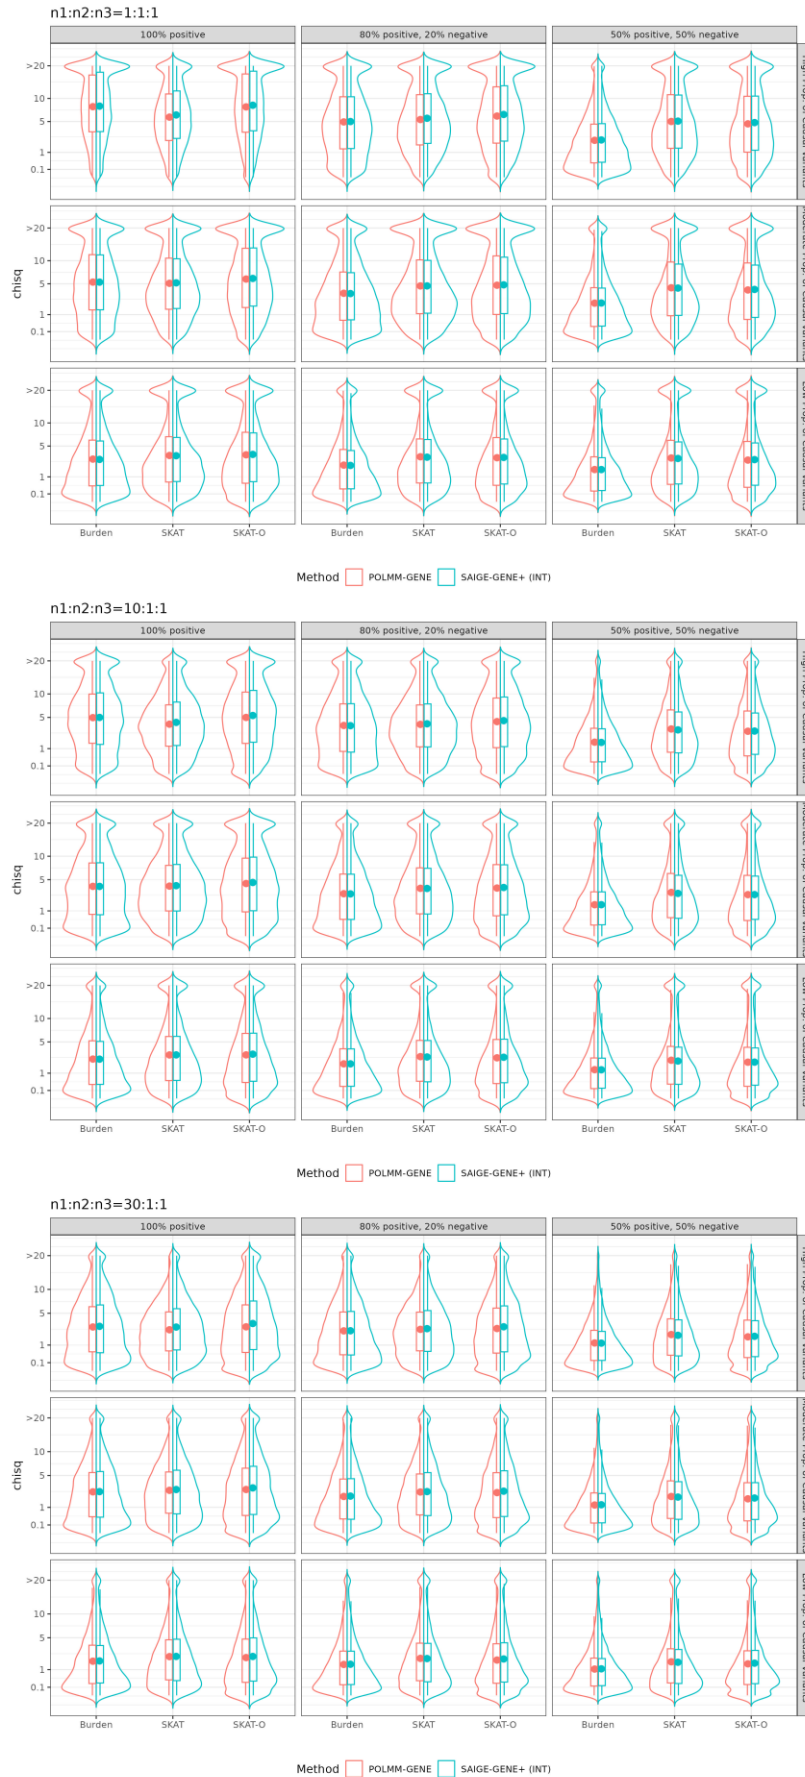

Figure S7. Comparison of p-values using POLMM-GENE and SAIGE-GENE+ (BINA). The sample size distribution of the three categorical levels is  $n_1:n_2:n_3=1:1:1$ . SAIGE-GENE+ considered the categorical data as a binary phenotype ( $n_1:n_2+n_3=1:2$ ). A total of 9 scenarios include 3 settings of causal variants proportional and three settings of the effect directions. For high proportion of causal variants, we simulated 80% of LoF and 50% of missense variants as causal variants; for moderate proportion of causal variants, we simulated 50% of LoF and 20% of missense variants as causal variants; for low proportion of causal variants, we simulated 20% of LoF and 10% of missense variants as causal variants.

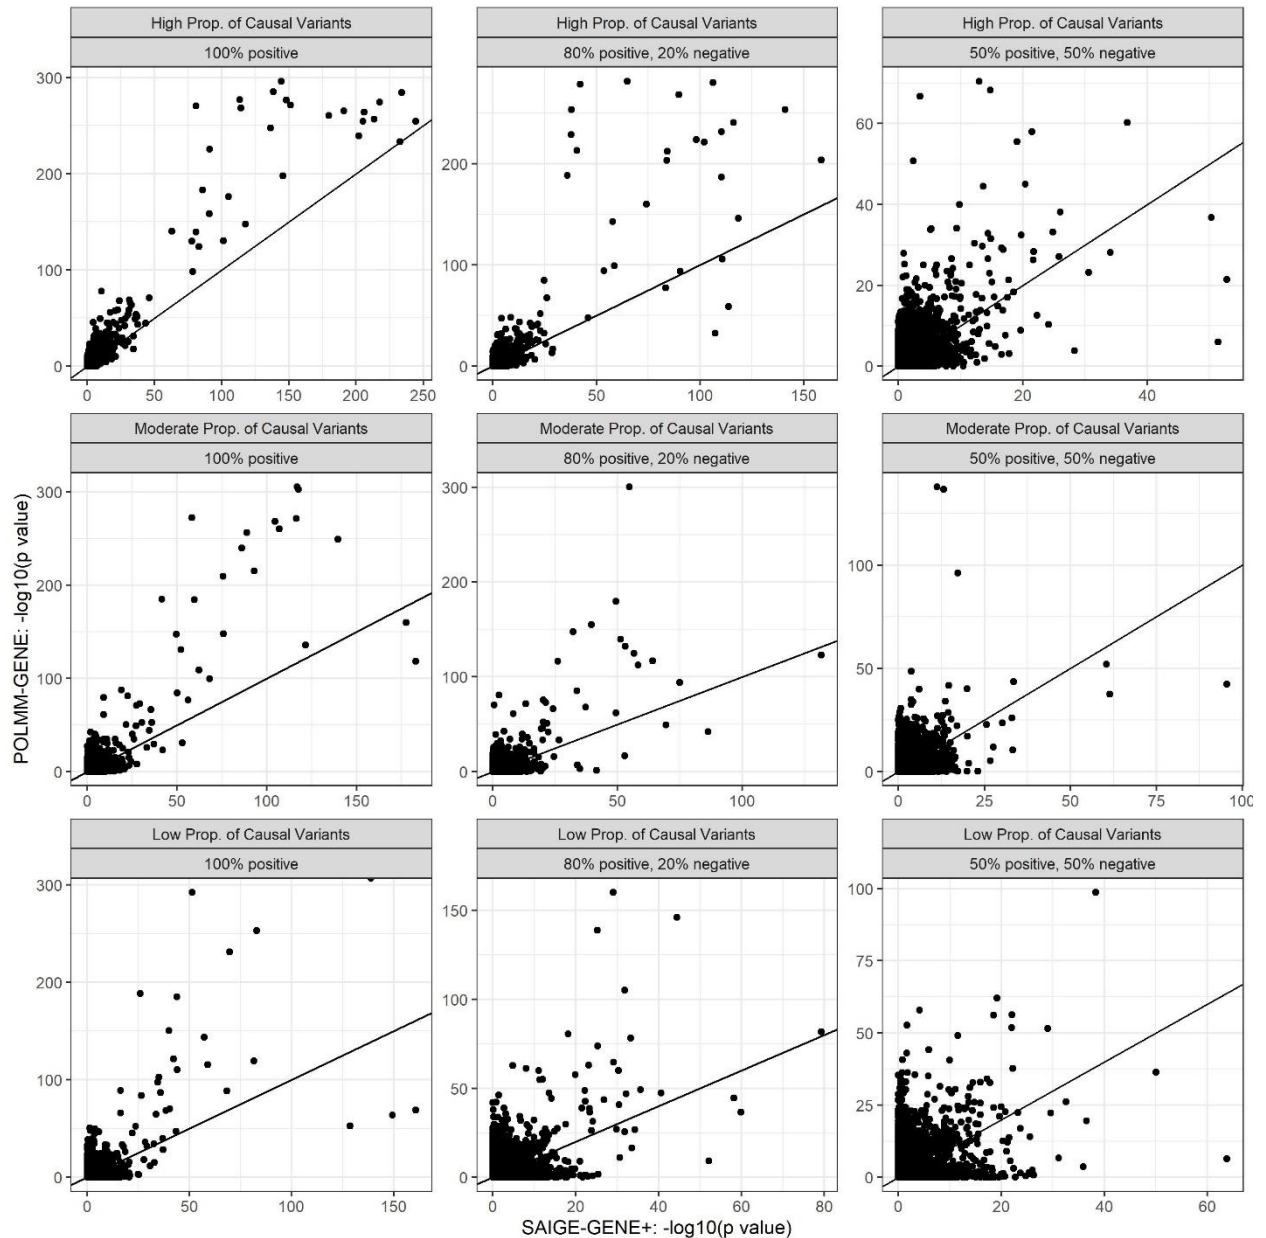



Figure S8. Empirical power of POLMM-GENE, SAIGE-GENE+ (BINA), SAIGE-GENE+ (RAW), and SAIGE-GENE+ (INT) at a significance level of  $2.5e-6$ .

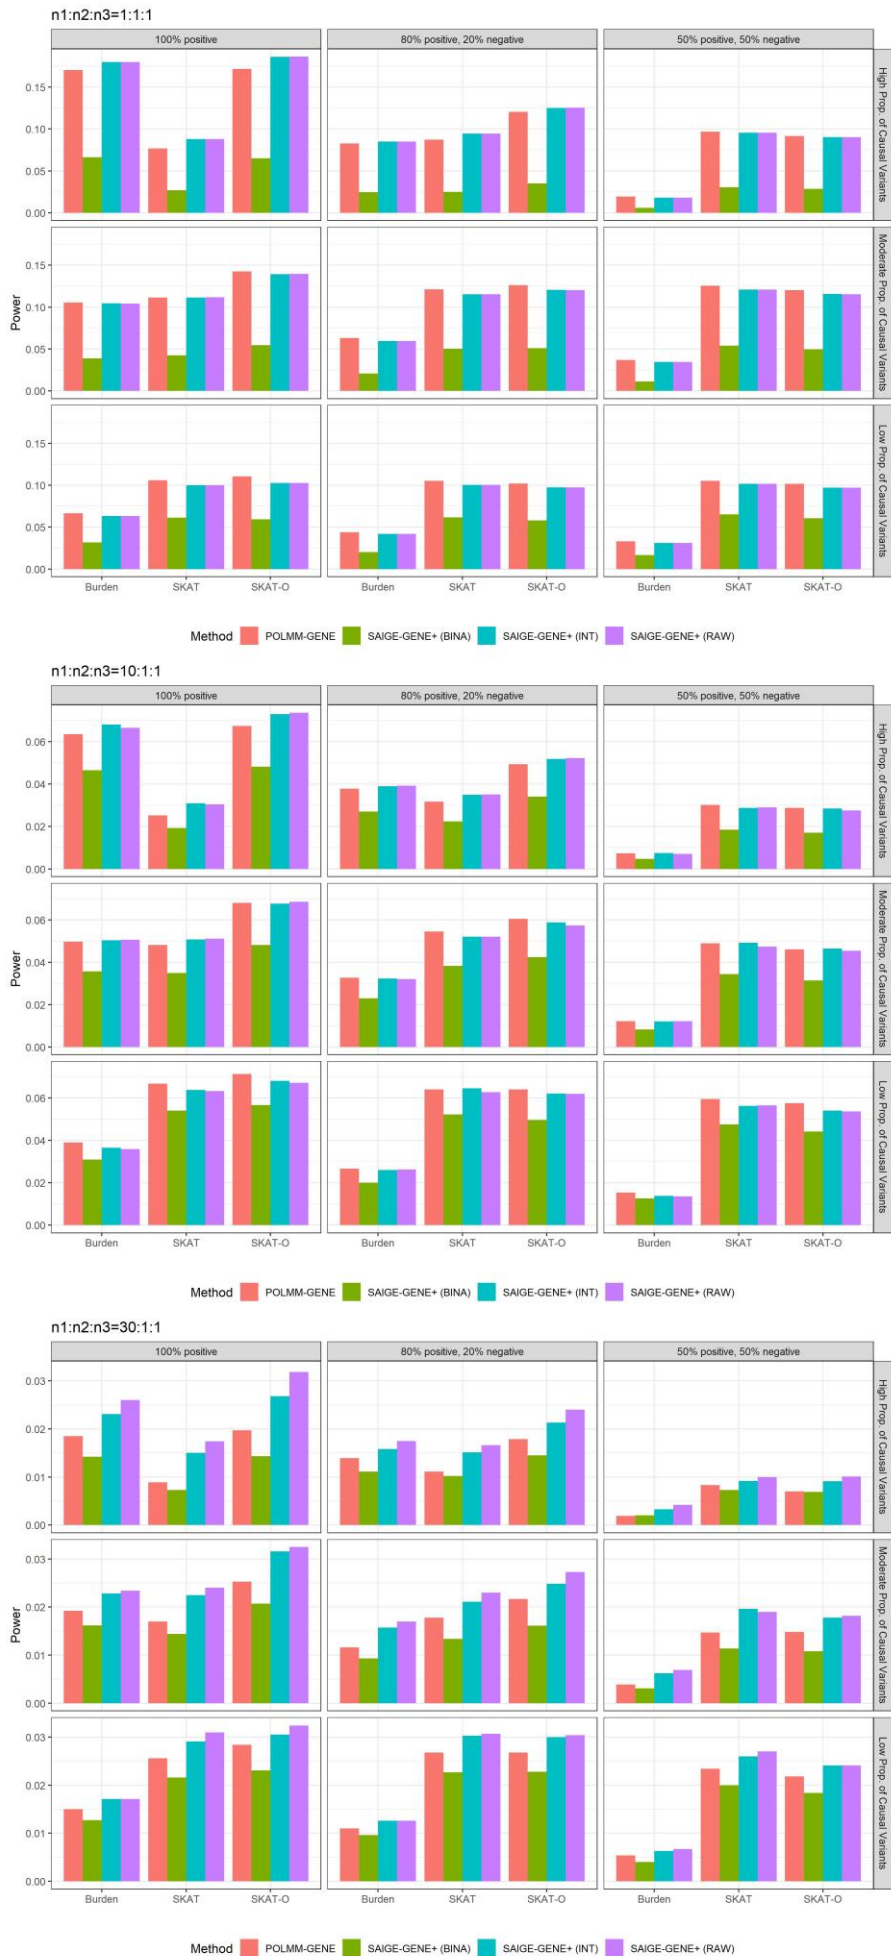

Figure S9. SAIGE-GENE+ (BINA): QQ plot of Cauchy combination SKAT-O p-values for five ordinal categorical phenotype analyses. For comparative height size at age 10, genes with p-values  $< 5e-9$  were labeled. The categorical traits were transformed to a binary trait prior to analysis. For trait of “alcohol intake frequency”, categories “daily or almost daily” and “three or four times a week” were grouped, and other categories were grouped. For trait of “cognitive symptoms severity”, categories “slight or mild problems”, “moderate”, and “severe” were grouped. For trait of “comparative body size at age 10”, categories “about average” and “plumper” were grouped. For trait of “comparative height size at age 10”, categories “shorted” and “about average” were grouped. For trait of “morning/evening person”, categories “definitely a morning person” and “more a morning than a evening” were grouped, and the other categories were grouped.

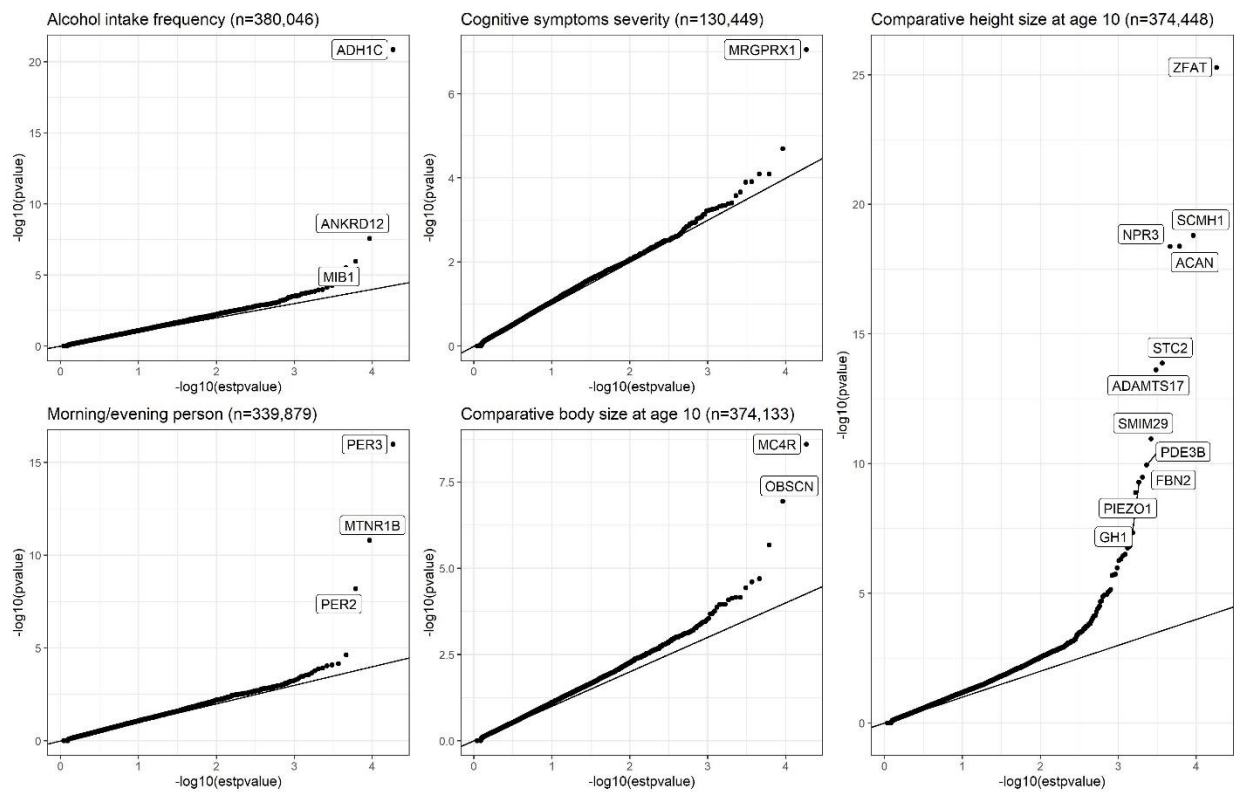

Figure S10. SAIGE-GENE+ (RAW): QQ plot of Cauchy combination SKAT-O p-values for five ordinal categorical phenotype analyses. For comparative height size at age 10, genes with p-values  $< 5e-9$  were labeled. The traits were recorded as 1, 2, ...,  $m$  where  $m$  is the number of categories.

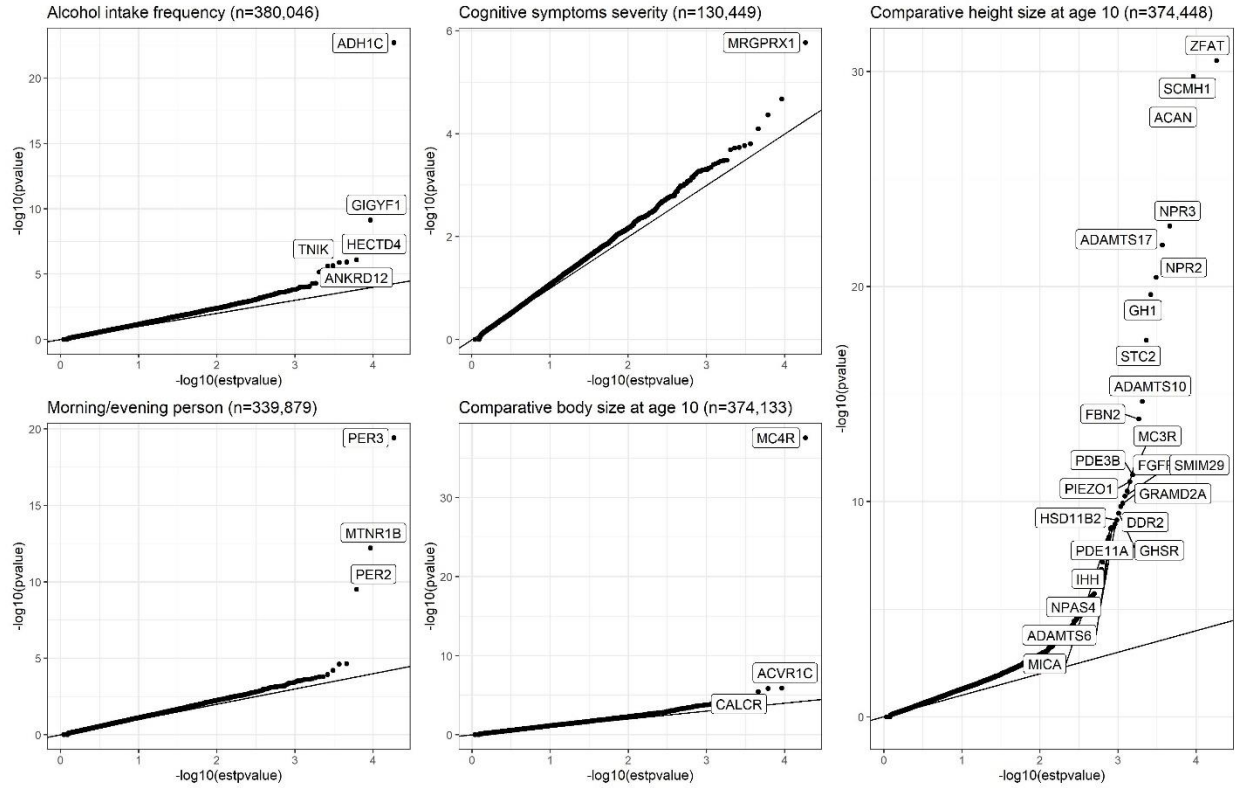

Figure S11. SAIGE-GENE+ (INT): QQ plot of Cauchy combination SKAT-O p-values for five ordinal categorical phenotype analyses. For comparative height size at age 10, genes with p-values  $< 5e-9$  were labeled. The traits were recorded as 1, 2, ...,  $m$  where  $m$  is the number of categories.

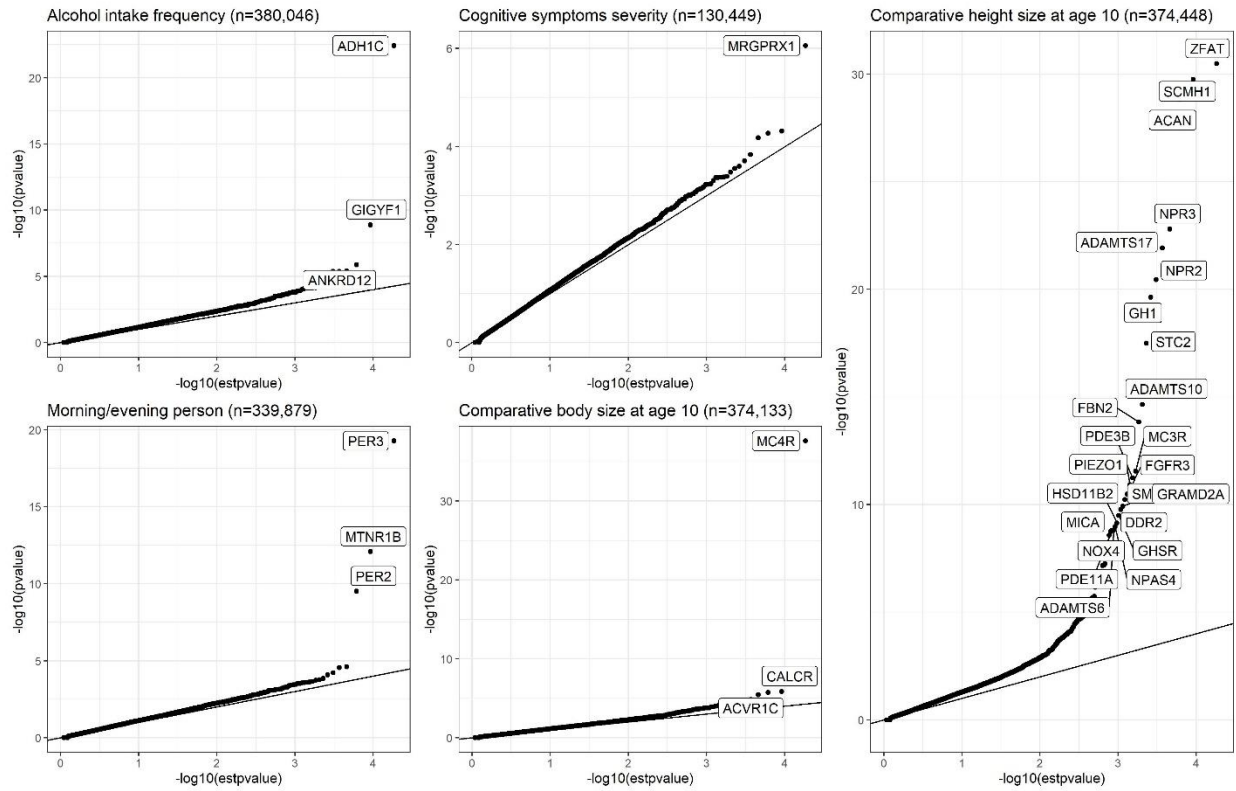

Figure S12. Comparison of POLMM-GENE and SAIGE-GENE+ approaches when analyzing “Comparative height size at age 10”

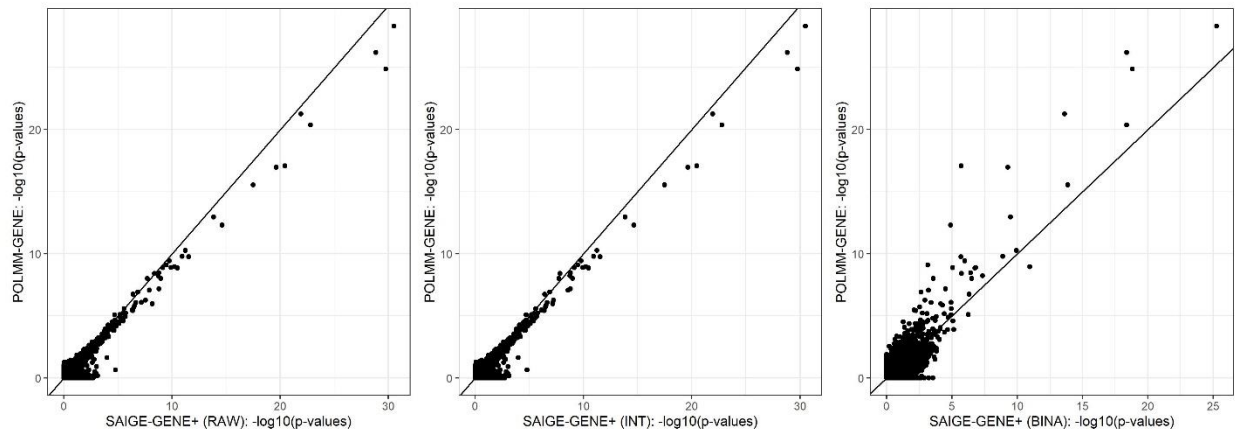

Table S1. Computation time and cost of the 5 ordinal categorical phenotypes analysis in UK Biobank RAP.

| chrom        | instance type   | Alcohol intake frequency | Cost         | Morning/evening person (chronotype) | Cost         | Comparative height size at age 10 | Cost         | Cognitive symptoms severity | Cost         | Comparative body size at age 10 | Cost         |
|--------------|-----------------|--------------------------|--------------|-------------------------------------|--------------|-----------------------------------|--------------|-----------------------------|--------------|---------------------------------|--------------|
| chr1         | mem1_ssd2_v2_x4 | 14:05:53                 | £0.94        | 7:46:13                             | £0.52        | 7:45:53                           | £0.51        | 3:37:38                     | £0.24        | 7:58:04                         | £0.53        |
| chr2         | mem1_ssd2_v2_x5 | 9:35:13                  | £0.64        | 5:25:19                             | £0.36        | 5:26:52                           | £0.36        | 2:22:11                     | £0.16        | 6:16:15                         | £0.42        |
| chr3         | mem1_ssd2_v2_x4 | 8:05:40                  | £0.54        | 4:18:55                             | £0.28        | 4:14:07                           | £0.28        | 2:00:11                     | £0.13        | 4:29:32                         | £0.30        |
| chr4         | mem2_ssd2_v2_x2 | 12:24:50                 | £0.66        | 3:44:32                             | £0.12        | 3:51:08                           | £0.13        | 1:46:22                     | £0.06        | 3:55:12                         | £0.13        |
| chr5         | mem2_ssd2_v2_x2 | 7:51:12                  | £0.26        | 4:17:44                             | £0.14        | 4:08:02                           | £0.14        | 2:01:42                     | £0.07        | 4:10:49                         | £0.14        |
| chr6         | mem1_ssd2_v2_x4 | 7:13:12                  | £0.48        | 3:52:57                             | £0.26        | 3:42:33                           | £0.24        | 1:44:56                     | £0.11        | 3:44:54                         | £0.25        |
| chr7         | mem1_ssd2_v2_x4 | 6:44:47                  | £0.45        | 3:39:05                             | £0.24        | 3:46:44                           | £0.25        | 1:36:48                     | £0.10        | 3:42:59                         | £0.24        |
| chr8         | mem2_ssd2_v2_x2 | 6:30:03                  | £0.22        | 3:28:35                             | £0.11        | 3:27:20                           | £0.11        | 1:34:19                     | £0.05        | 3:23:22                         | £0.11        |
| chr9         | mem2_ssd2_v2_x2 | 7:48:58                  | £0.26        | 4:08:28                             | £0.14        | 4:19:22                           | £0.14        | 2:00:00                     | £0.07        | 4:19:49                         | £0.14        |
| chr10        | mem2_ssd2_v2_x2 | 6:48:18                  | £0.23        | 3:51:18                             | £0.13        | 3:45:04                           | £0.12        | 1:51:24                     | £0.06        | 3:54:31                         | £0.13        |
| chr11        | mem1_ssd2_v2_x4 | 9:20:37                  | £0.62        | 4:46:54                             | £0.32        | 4:54:08                           | £0.32        | 2:10:05                     | £0.14        | 4:51:50                         | £0.32        |
| chr12        | mem1_ssd2_v2_x4 | 7:45:54                  | £0.52        | 4:00:31                             | £0.26        | 3:52:35                           | £0.26        | 1:43:22                     | £0.11        | 3:47:06                         | £0.25        |
| chr13        | mem2_ssd2_v2_x2 | 3:27:18                  | £0.11        | 1:45:17                             | £0.06        | 1:42:03                           | £0.06        | 0:51:32                     | £0.03        | 1:43:48                         | £0.06        |
| chr14        | mem2_ssd2_v2_x2 | 6:04:14                  | £0.20        | 3:00:39                             | £0.10        | 3:02:43                           | £0.10        | 1:26:58                     | £0.05        | 3:00:47                         | £0.10        |
| chr15        | mem2_ssd2_v2_x2 | 6:18:19                  | £0.21        | 3:28:58                             | £0.11        | 3:21:35                           | £0.11        | 1:34:35                     | £0.05        | 3:14:50                         | £0.11        |
| chr16        | mem1_ssd2_v2_x4 | 7:14:18                  | £0.48        | 3:46:29                             | £0.25        | 3:47:20                           | £0.25        | 1:42:28                     | £0.11        | 3:41:26                         | £0.24        |
| chr17        | mem1_ssd2_v2_x4 | 8:30:11                  | £0.56        | 4:26:48                             | £0.29        | 4:24:21                           | £0.29        | 2:01:29                     | £0.13        | 4:36:51                         | £0.30        |
| chr18        | mem2_ssd2_v2_x2 | 2:54:58                  | £0.10        | 1:30:12                             | £0.05        | 1:33:30                           | £0.05        | 0:45:34                     | £0.02        | 1:39:17                         | £0.05        |
| chr19        | mem1_ssd2_v2_x4 | 11:04:40                 | £0.74        | 5:53:23                             | £0.39        | 5:39:49                           | £0.37        | 2:30:19                     | £0.16        | 6:50:59                         | £0.45        |
| chr20        | mem2_ssd2_v2_x2 | 4:51:36                  | £0.16        | 2:28:39                             | £0.08        | 2:26:22                           | £0.08        | 1:13:21                     | £0.04        | 2:30:49                         | £0.08        |
| chr21        | mem2_ssd2_v2_x2 | 2:03:10                  | £0.07        | 1:08:40                             | £0.04        | 1:05:50                           | £0.04        | 0:35:45                     | £0.02        | 1:08:04                         | £0.04        |
| chr22        | mem2_ssd2_v2_x2 | 4:30:42                  | £0.15        | 2:14:31                             | £0.07        | 2:17:47                           | £0.08        | 1:07:09                     | £0.04        | 2:18:44                         | £0.08        |
| <b>Total</b> |                 |                          | <b>£8.60</b> |                                     | <b>£4.32</b> |                                   | <b>£4.29</b> |                             | <b>£1.95</b> |                                 | <b>£4.47</b> |

The allocated instance: "on-demand" for job of chr4 to analyze "Alcohol intake frequency", "spot" for the other jobs
